# Supplementary material
Source: PubMed Central journal article supplement (PMC7228847)
Supplement: NIHMS1578689-supplement-3.pdf [file NIHMS1578689-supplement-3.pdf]

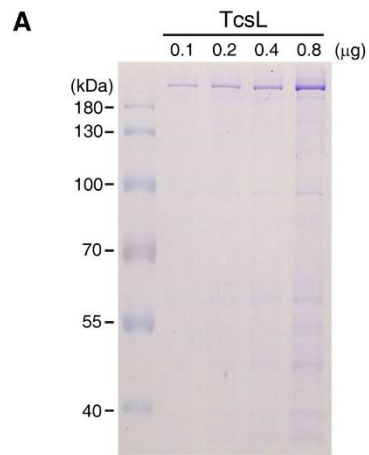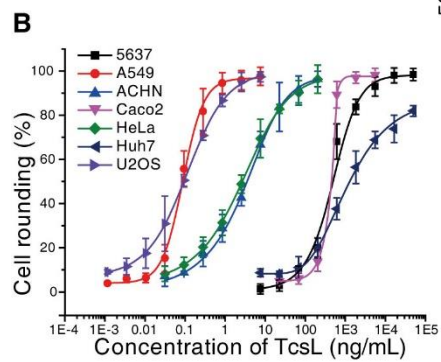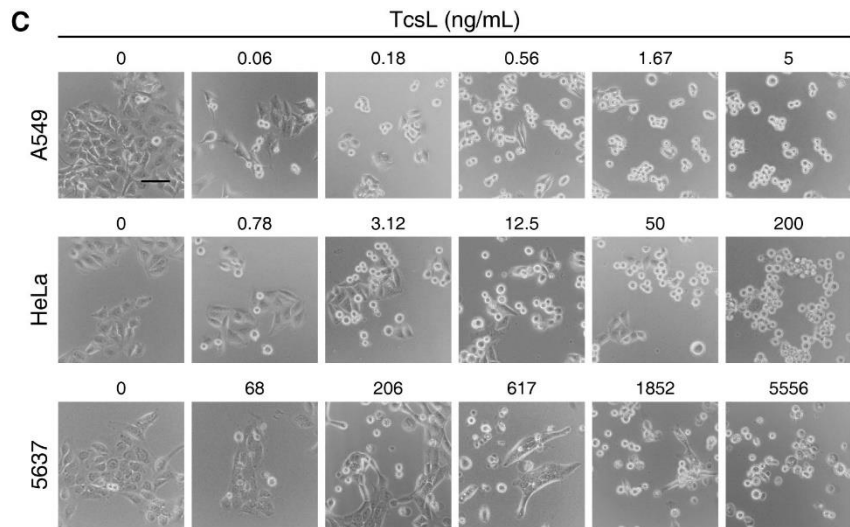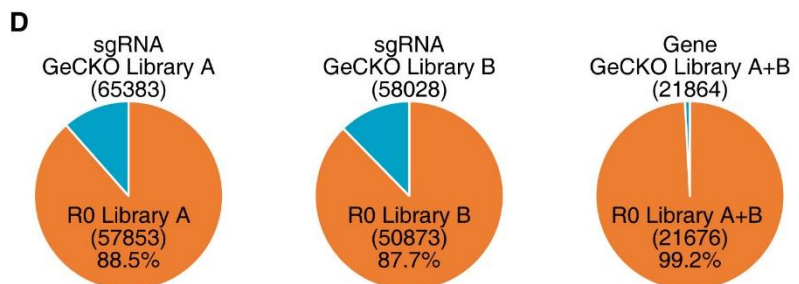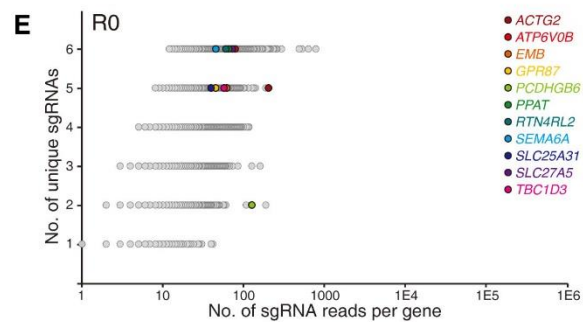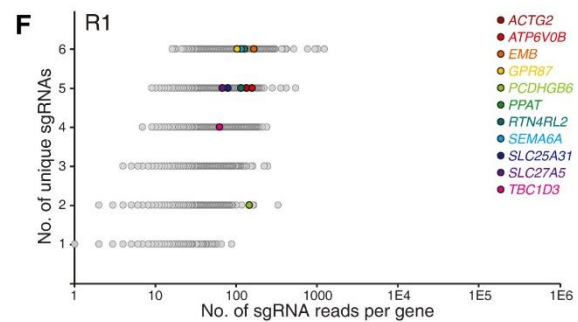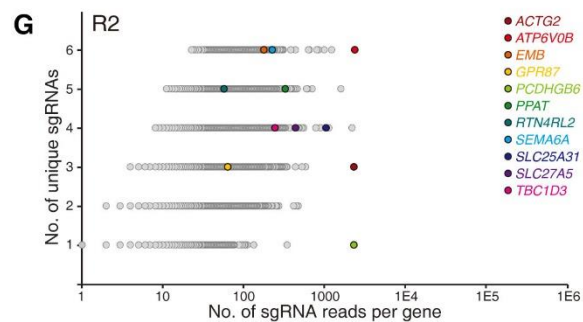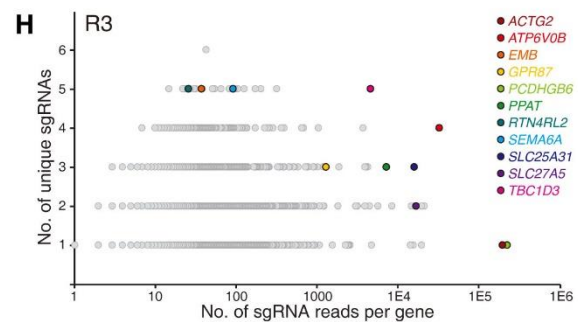

**Figure S1. CRISPR-cas9 mediated genome-wide screen for TcsL. Related to Figure 1.**

**(A)** SDS-PAGE and Coomassie blue staining showing purified TcsL. Recombinant His6-tagged TcsL was expressed in *B. megaterium* and purified through Ni-NTA column and gel filtration column.

**(B)** A range of human cell lines were exposed to TcsL for 24 h and the percentages of rounded cells were plotted over toxin concentrations. A549 cells and U2OS cells are the most sensitive ones to TcsL. Error bars indicate mean  $\pm$  s.d.,  $N = 3$ .

**(C)** Representative images showing the cell rounding effect in A549, HeLa, and 5637 cells after incubation with the indicated concentrations of TcsL for 24 h. Scale bar, 50  $\mu$ m.

**(D)** The recovery rates of sgRNAs and genes identified in R0 compared with the original GeCKO-V2 library.

**(E-H)** Genes identified in each round (**E** for R0, **F** for R1, **G** for R2, **H** for R3) are plotted based on the number of unique sgRNAs ( $y$  axis) and total number of sgRNA reads ( $x$  axis). The top hits investigated here are marked and color-coded. They are enriched from R0 to R3.

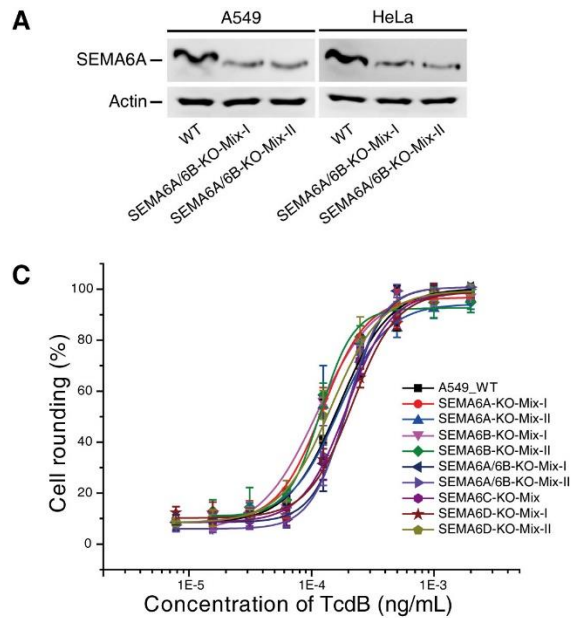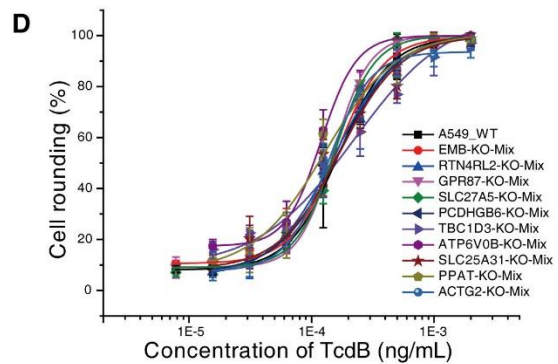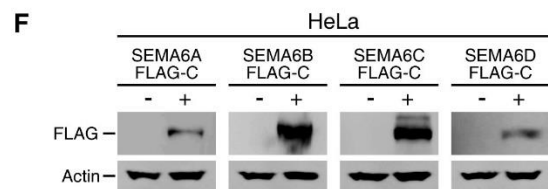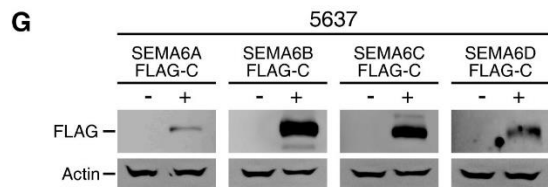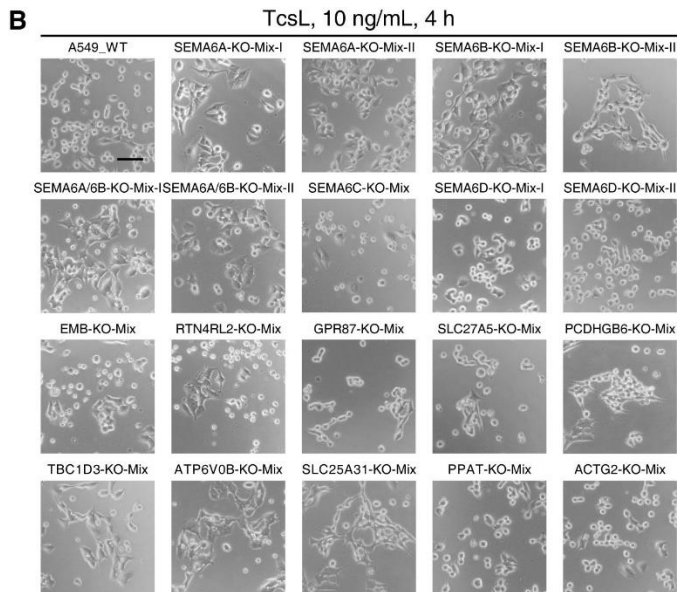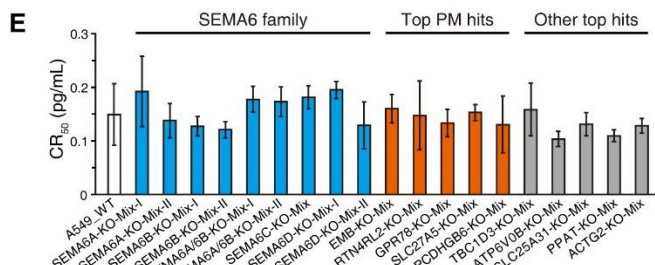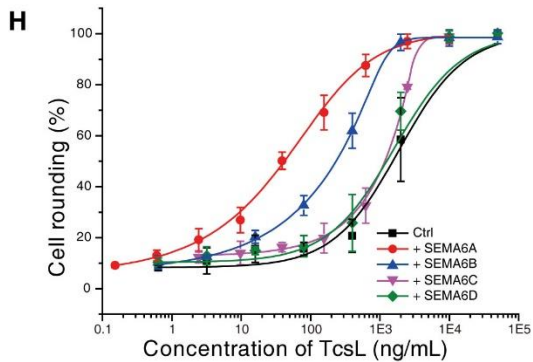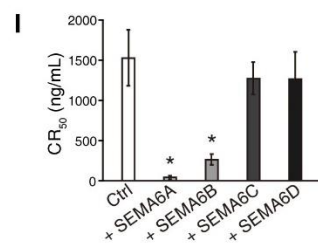

**Figure S2. Testing the sensitivity of TcsL and TcdB on mixed KO cells and SEMA6A/6B overexpression cells. Related to Figure 2.**

**(A)** The KO efficiency of SEMA6A in A549 and HeLa cells were confirmed via immunoblot detecting endogenous SEMA6A. Actin was used as a loading control. Representative images were shown from three independent experiments.

**(B)** Experiments were carried out as described in Figures 2A and 2B. Representative images showing the cell rounding effect in A549 WT and the indicated mixed KO cells after 4 h incubation with TcsL (10 ng/mL). Scale bar, 50  $\mu$ m.

**(C-E)** The indicated mixed A549 KO cell lines were exposed to TcdB for 24 h and the percentages of rounded cells were plotted. Their CR<sub>50</sub> are plotted in a bar-chart (**E**). PM, plasma membrane. Error bars indicate mean  $\pm$  s.d.,  $N = 3$ .

**(F-G)** SEMA6A, 6B, 6C, and 6D were expressed in HeLa (panel **F**) or a bladder carcinoma cell line 5637 (panel **G**) via lentiviral transduction. Expressed exogenous SEMA6 proteins in cells were confirmed via immunoblot detecting the triple FLAG tag fused to their C-termini. Actin was used as a loading control. Representative images were shown from two independent experiments.

**(H-I)** 5637 cells overexpressing SEMA6 family proteins via lentiviral transduction were exposed to TcsL for 24 h and the percentages of rounded cells were plotted (panel **H**). Their CR<sub>50</sub> were determined and shown in a bar-chart (panel **I**). Ctrl: Control. Error bars indicate mean  $\pm$  s.d.,  $N = 3$ , \*,  $p < 0.01$  (one-way ANOVA).

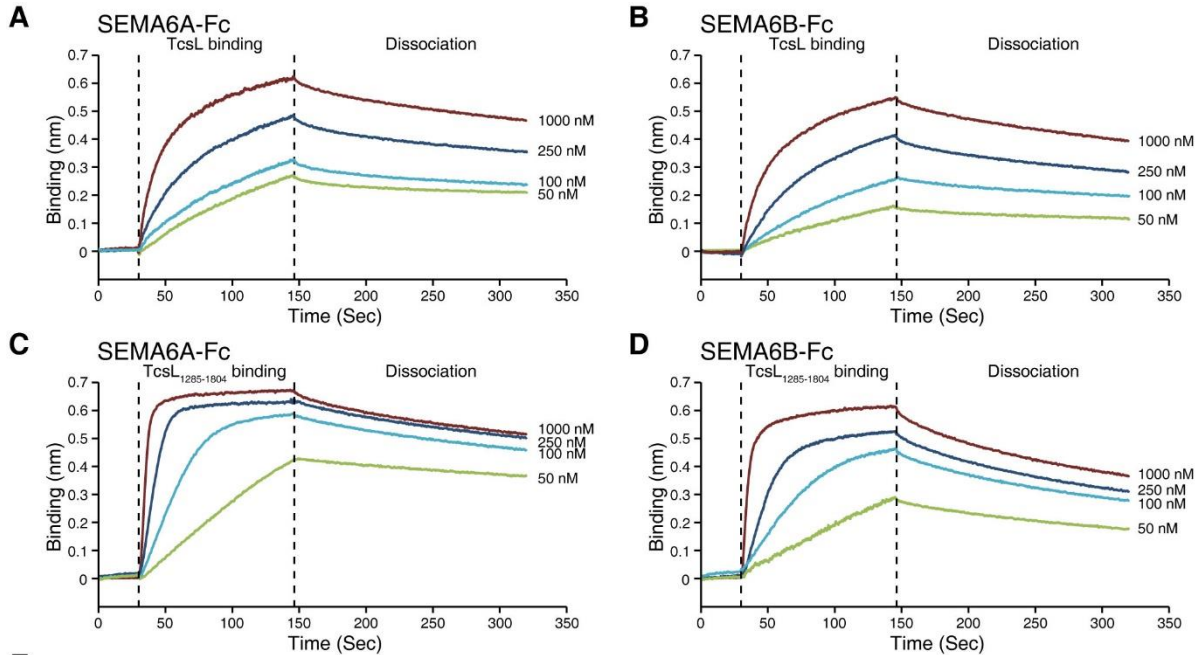

|                                              | $k_a$ ( $M^{-1}s^{-1}$ )                | $k_d$ ( $s^{-1}$ )                            | $K_D$ (M)                                      |
|----------------------------------------------|-----------------------------------------|-----------------------------------------------|------------------------------------------------|
| <b>TcsL vs SEMA6A-Fc</b>                     | $4.71 \times 10^4 \pm 1.12 \times 10^3$ | $1.87 \times 10^{-3} \pm 4.76 \times 10^{-5}$ | $3.97 \times 10^{-8} \pm 1.95 \times 10^{-9}$  |
| <b>TcsL vs SEMA6B-Fc</b>                     | $3.61 \times 10^4 \pm 7.01 \times 10^2$ | $2.18 \times 10^{-3} \pm 4.19 \times 10^{-5}$ | $6.04 \times 10^{-8} \pm 2.34 \times 10^{-9}$  |
| <b>TcsL<sub>1285-1804</sub> vs SEMA6A-Fc</b> | $2.45 \times 10^5 \pm 6.34 \times 10^3$ | $1.58 \times 10^{-3} \pm 8.08 \times 10^{-5}$ | $6.45 \times 10^{-9} \pm 4.97 \times 10^{-10}$ |
| <b>TcsL<sub>1285-1804</sub> vs SEMA6B-Fc</b> | $1.51 \times 10^5 \pm 2.49 \times 10^3$ | $3.48 \times 10^{-3} \pm 6.27 \times 10^{-5}$ | $2.30 \times 10^{-8} \pm 7.94 \times 10^{-10}$ |

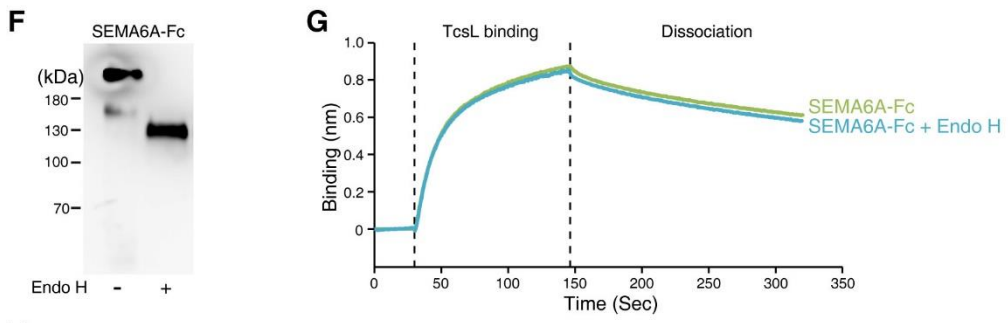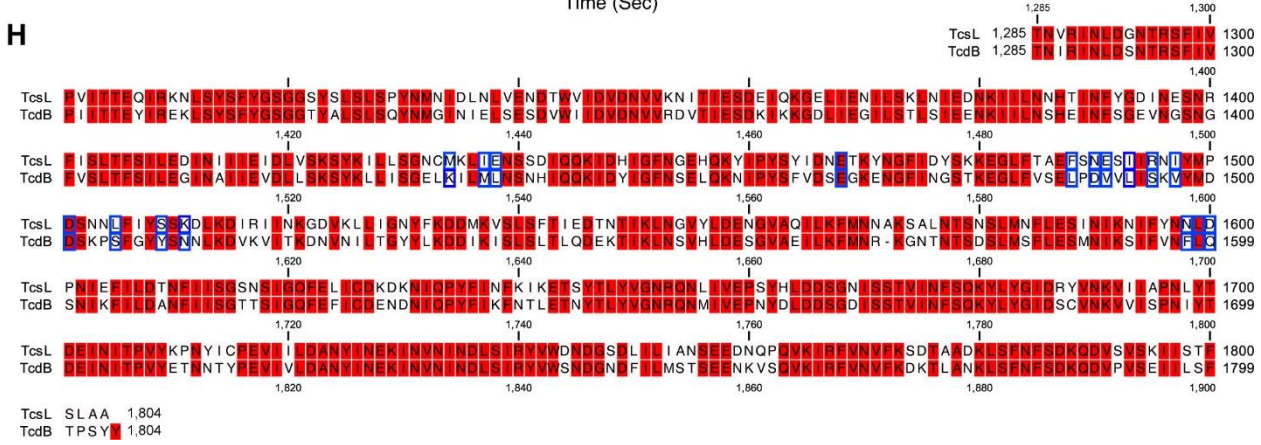

**Figure S3. Characterizing TcsL-SEMA interactions. Related to Figure 3.**

**(A-B)** The binding kinetics and affinity were determined using BLI assays for interactions between TcsL and SEMA6A-ECD (**A**), and between TcsL and SEMA6B-ECD (**B**). These parameters are summarized in panel **E** (mean  $\pm$  s.d.). Representative sensorgrams from one of two independent experiments are shown.

**(C-E)** The binding kinetics and affinity were determined using BLI assays for interactions between TcsL<sub>1285-1804</sub> and SEMA6A-ECD (**C**), and between TcsL<sub>1285-1804</sub> and SEMA6B-ECD (**D**). These parameters are summarized in panel **E** (mean  $\pm$  s.d.). Representative sensorgrams from one of two independent experiments are shown.

**(F)** SEMA6A-ECD was treated with Endo H and analyzed by immunoblot, which showed a reduced molecular weight compared with untreated SEMA6A-ECD.

**(G)** Binding of SEMA6A-ECD treated with Endo H to TcsL was characterized using BLI assays, which showed similar levels of binding comparable with untreated SEMA6A-ECD.

**(H)** Sequence alignment of TcsL and TcdB at TcdB-FBD region. The conserved residues are marked in red. The key residues involve in TcdB-CRD2 interactions are highlighted in blue and the majority of them are different between TcsL and TcdB.

**A**

A549, TcsL, 40 pM, 5 h

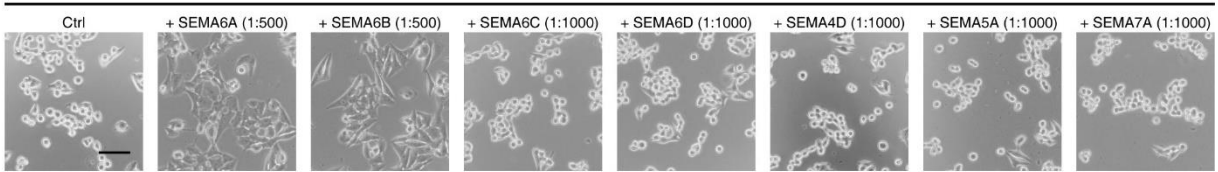**B**

A549, TcdB, 0.4 pM, 4 h

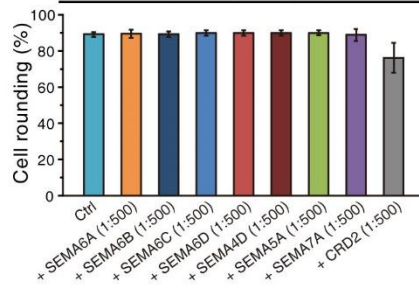**C**HeLa, TcsL  
4 nM, 6 h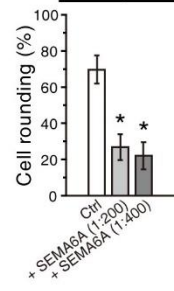**D**

HUVEC, TcsL, 4 pM, 4 h

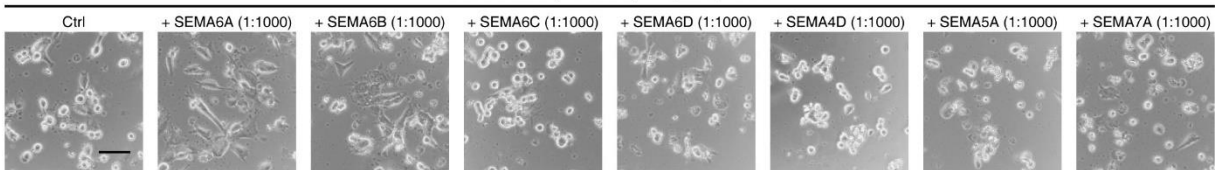**E**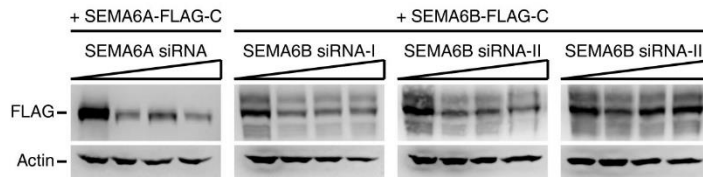

**Figure S4. SEMA6A and 6B mediate TcsL entry into cells. Related to Figure 4.**

(A) Experiments were carried out as described in Figures 4B and 4C. Representative images of the cell rounding effect in A549 cells are shown. Scale bar, 50  $\mu\text{m}$ .

(B) A549 cells were exposed to either TcdB alone (0.4  $\mu\text{M}$ , 4 h) or TcdB pre-incubated with the indicated proteins at the indicated molar ratio. The percentages of rounded cells at 4 h are shown in a bar chart. Error bars indicate mean  $\pm$  s.d.,  $N = 3$ .

(C) HeLa cells exposed to either TcsL alone (4 nM, 6 h) or TcsL pre-incubated with SEMA6A-ECD at 1:200 or 1:400 molar ratios. The percentages of rounded cells are shown in a bar chart. Error bars indicate mean  $\pm$  s.d.,  $N = 3$ , \*,  $p < 0.01$  (Student's *t*-test).

(D) Experiments were carried out as described in Figures 4D and 4E. Representative images of the cell rounding effect in HUVECs are shown. Scale bar, 50  $\mu\text{m}$ .

(E) Validation of siRNA knockdown efficacy. HEK293T cells were seeded in 24-well plate and transfected with SEMA6A or SEMA6B (with C-terminal 3xFLAG tag). The gradient of siRNA was set up as 0, 1, 2, and 3  $\mu\text{L}$  siRNA (20  $\mu\text{M}$  stock) plus 2, 2, 4, and 6  $\mu\text{L}$  Lipofectamine RNAiMAX reagent, respectively. Cells were harvested 48 h later and subjected to immunoblot assays. Expression of SEMA6A and 6B was detected via their FLAG tags. Actin served as a loading control. Representative blots are shown from two independent experiments. SEMA6A siRNA and SEMA6B siRNA-II were selected for the double knockdown experiment in HUVECs.



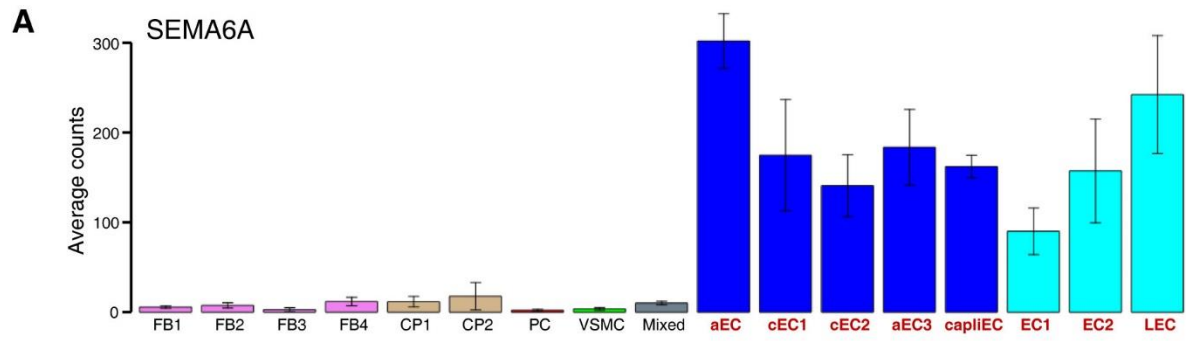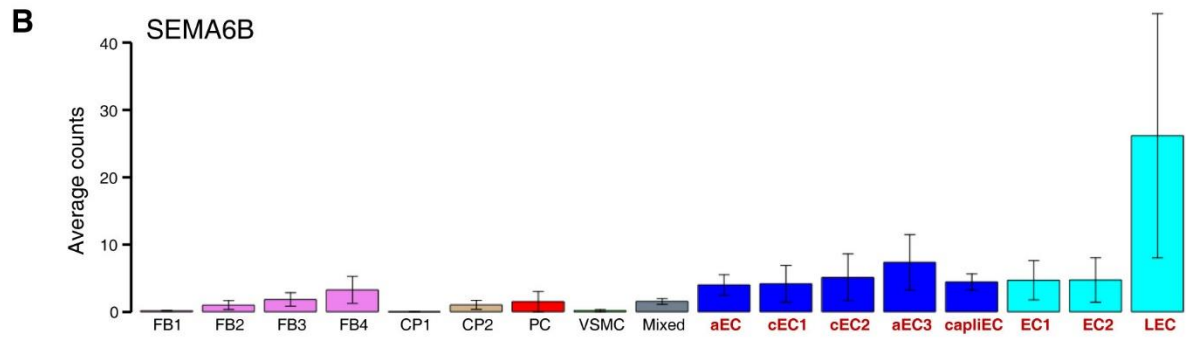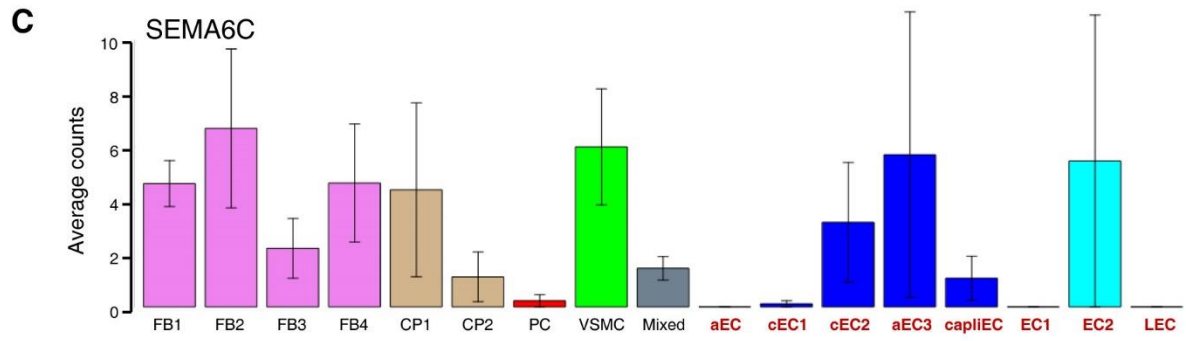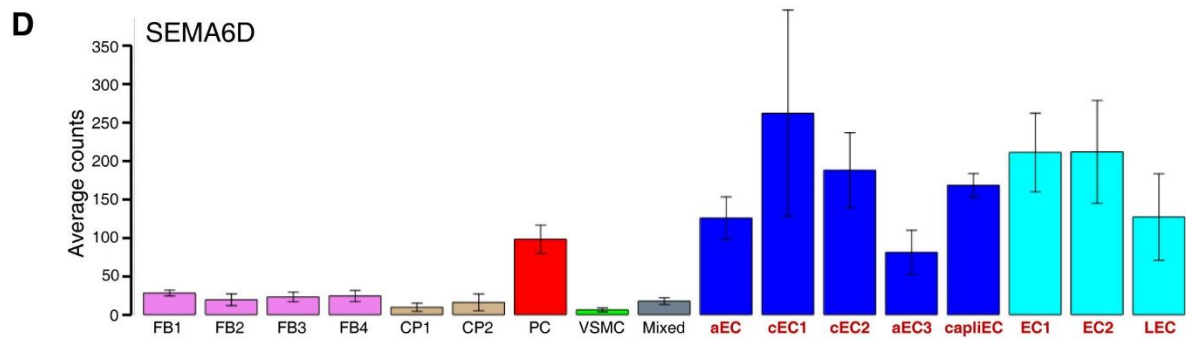

**Figure S5. Expression of SEMA6 family in different cell types in mouse lung tissues. Related to Figure 5.**

Expression of SEMA6A (**A**), 6B (**B**), 6C (**C**), and 6D (**D**) in various lung cells were plotted based on published single cell RNAseq data (<http://betsholtzlab.org/VascularSingleCells/database.html>) (He et al., 2018; Vanlandewijck et al., 2018). FB: Vascular fibroblast-like cells; CP: Cartilage perichondrium; PC: Pericytes; VSMC: Vascular smooth muscle cells; EC: Endothelial cells (highlighted in red); capil - capillary; a - arterial; c - continuum; L - Lymphatic; 1,2,3,4 - subtypes.

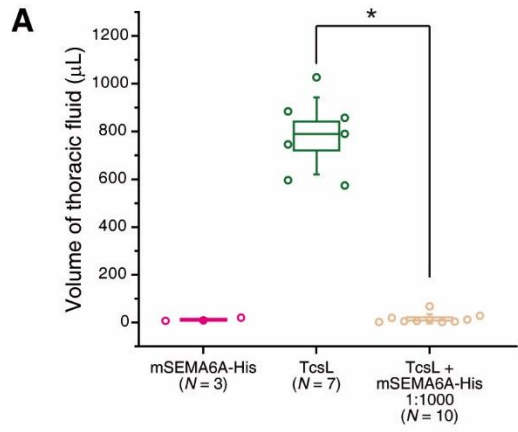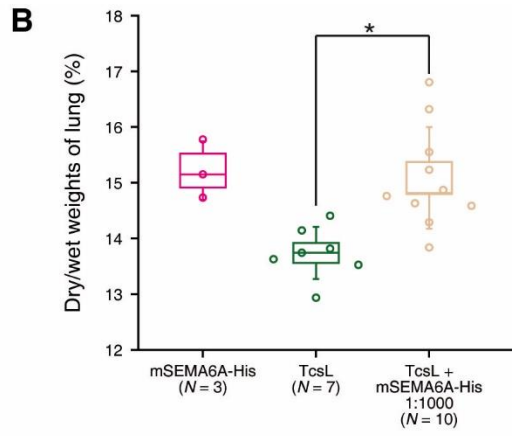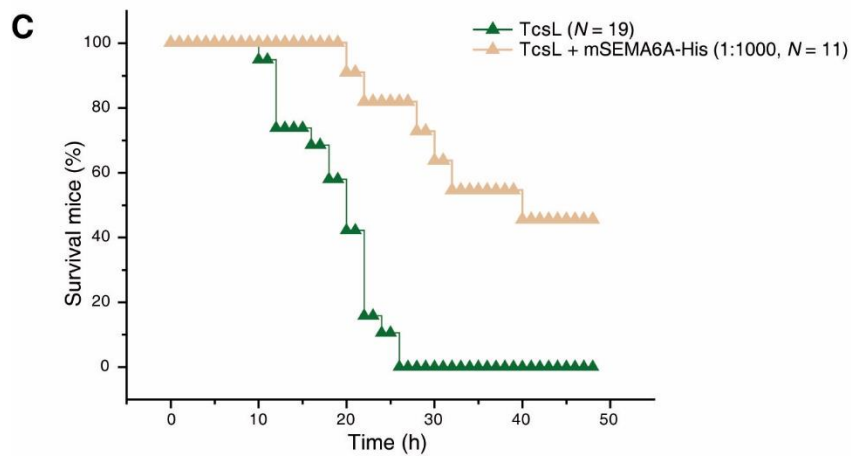

**Figure S6. His-tagged SEMA6A-ECD reduces TcsL-induced toxicity in mice. Related to Figure 5 and Figure 6.**

**(A-B)** Co-injection of TcsL (20 ng per 25 g bodyweight) with mouse SEMA6A-His protein (mSEMA6A-His) at 1:1000 (w/w) ratio reduced accumulation of fluid in the thoracic cavity (**A**) and reduced dry-to-wet weight ratio of lung tissue 4 h after the injection (**B**). Injection of mSEMA6A-His alone was examined in parallel. Boxes indicate  $\pm$  s.e.m., error bars indicate  $\pm$  s.d., \*,  $p < 0.01$  (one-way ANOVA).

**(C)** Five in a total of eleven mice with co-injection of TcsL and mSEMA6A-His (1:1000 ratio) survived, while all mice injected with TcsL alone died ( $p < 0.001$ , Kaplan-Meier Log-Rank test).

**Table S1. Oligonucleotides used in this study. Related to STAR Methods section.**

| Name           | Sequence (5'-3')                                      | Purpose                                |
|----------------|-------------------------------------------------------|----------------------------------------|
| SEMA6A_sg_F    | CACCGTTGCCATGCGAAATACTGAT                             | sgRNA Targeting SEMA6A                 |
| SEMA6A_sg_R    | AAACATCAGTATTTTCGCATGGCAAC                            | sgRNA Targeting SEMA6A                 |
| SEMA6A-II_sg_F | CACCGGGCTTGTGGCCCACAAACAC                             | sgRNA Targeting SEMA6A                 |
| SEMA6A-II_sg_R | AAACGTGTTTGTGGGCCACAAGCCC                             | sgRNA Targeting SEMA6A                 |
| SEMA6B_sg_F    | CACCGCGAGTGTGCAAACTTCGTAA                             | sgRNA Targeting SEMA6B                 |
| SEMA6B_sg_R    | AAACTTACGAAGTTTCGACACTCGC                             | sgRNA Targeting SEMA6B                 |
| SEMA6B-II_sg_F | CACCGTGGGGGGCTCCAGCTCTACG                             | sgRNA Targeting SEMA6B                 |
| SEMA6B-II_sg_R | AAACCGTAGAGCTGGAGCCCCCAC                              | sgRNA Targeting SEMA6B                 |
| SEMA6C_sg_F    | CACCGTATCCCTTCAGTATCTAACA                             | sgRNA Targeting SEMA6C                 |
| SEMA6C_sg_R    | AAACTGTTAGATACTGAAGGGATAC                             | sgRNA Targeting SEMA6C                 |
| SEMA6D_sg_F    | CACCGAGTGATAGTCGACAGTATTA                             | sgRNA Targeting SEMA6D                 |
| SEMA6D_sg_R    | AAACTAATACTGTGCGACTATCACTC                            | sgRNA Targeting SEMA6D                 |
| SEMA6D-II_sg_F | CACCGGAAAGCTGACTGCCCTCAAC                             | sgRNA Targeting SEMA6D                 |
| SEMA6D-II_sg_R | AAACGTTGAGGGCAGTCAGCTTTCC                             | sgRNA Targeting SEMA6D                 |
| EMB_sg_F       | CACCGAGTCATAACATATCACTGAC                             | sgRNA Targeting EMB                    |
| EMB_sg_R       | AAACGTCAGTGATATGTTATGACTC                             | sgRNA Targeting EMB                    |
| RTN4RL2_sg_F   | CACCGATCGAGACAAGATGCTGCC                              | sgRNA Targeting RTN4RL2                |
| RTN4RL2_sg_R   | AAACGGGCAGCATCTTGTCTCGATC                             | sgRNA Targeting RTN4RL2                |
| GPR87_sg_F     | CACCGGTCTGCGTGTAATGTTTGCC                             | sgRNA Targeting GPR87                  |
| GPR87_sg_R     | AAACGGCAAACATTACACGCAGACC                             | sgRNA Targeting GPR87                  |
| SLC27A5_sg_F   | CACCGGTGCAACTGCACCAGCTCAA                             | sgRNA Targeting SLC27A5                |
| SLC27A5_sg_R   | AAACTTGAGCTGGTGCAGTTCGACC                             | sgRNA Targeting SLC27A5                |
| PCDHGB6_sg_F   | CACCGTTTCGACCAGACGTCCTACG                             | sgRNA Targeting PCDHGB6                |
| PCDHGB6_sg_R   | AAACCGTAGGACGTCTGGTGCAAAC                             | sgRNA Targeting PCDHGB6                |
| TBC1D3_sg_F    | CACCGGCTTCCGCTTTGATGTGGCA                             | sgRNA Targeting TBC1D3                 |
| TBC1D3_sg_R    | AAACTGCCACATCAAAGCGGAAGCC                             | sgRNA Targeting TBC1D3                 |
| ATP6V0B_sg_F   | CACCGTTGTTGTTGTAGCTTCGAAA                             | sgRNA Targeting ATP6V0B                |
| ATP6V0B_sg_R   | AAACTTTCGAAGCTACAACAACAAC                             | sgRNA Targeting ATP6V0B                |
| SLC25A31_sg_F  | CACCGCCCTTGAATTGTCGCTCCTC                             | sgRNA Targeting SLC25A31               |
| SLC25A31_sg_R  | AAACGAGGAGCGACAATTCAAGGGC                             | sgRNA Targeting SLC25A31               |
| PPAT_sg_F      | CACCGTTCGTTGTTGAAACACTTCA                             | sgRNA Targeting PPAT                   |
| PPAT_sg_R      | AAACTGAAGTGTTCACAACAACGAAC                            | sgRNA Targeting PPAT                   |
| ACTG2_sg_F     | CACCGGTGTGACATTGACATCCGTA                             | sgRNA Targeting ACTG2                  |
| ACTG2_sg_R     | AAACTACGGATGTCAATGTCACACC                             | sgRNA Targeting ACTG2                  |
| SEMA6A_01F     | AGCTTGGTACCGAGCTCGGATCCATGAGGTC<br>AGAAGCCTTGCTGCTAT  | Clone SEMA6A into<br>pcDNA3.1-3xFlag-C |
| SEMA6A_02R     | GAACCAGAACCAGAACCGAATTCTGTACAC<br>GCATCATTGGGCTTCATGG | Clone SEMA6A into<br>pcDNA3.1-3xFlag-C |

|                |                                                                                     |                                                        |
|----------------|-------------------------------------------------------------------------------------|--------------------------------------------------------|
| SEMA6B_01F     | AGCTTGGTACCGAGCTCGGATCCATGCAGAC<br>CCCCGAGCGTCCCCTC                                 | Clone SEMA6A into<br>pcDNA3.1-3xFlag-C                 |
| SEMA6B_02R     | GAACCAGAACCAGAACCGAATTCGGGCACG<br>GGGGGCGCAGTCCT                                    | Clone SEMA6A into<br>pcDNA3.1-3xFlag-C                 |
| SEMA6C_01F     | AGCTTGGTACCGAGCTCGGATCCATGCCCCG<br>TGCCCC                                           | Clone SEMA6A into<br>pcDNA3.1-3xFlag-C                 |
| SEMA6C_02R     | GAACCAGAACCAGAACCGAATTCAAAGTTG<br>AAACGGCCGCCGTTT                                   | Clone SEMA6A into<br>pcDNA3.1-3xFlag-C                 |
| SEMA6D_01F     | AGCTTGGTACCGAGCTCGGATCCATGAGGGT<br>CTTCCTGCTTTGTGCC                                 | Clone SEMA6A into<br>pcDNA3.1-3xFlag-C                 |
| SEMA6D_02R     | GAACCAGAACCAGAACCGAATTCGTATGTGT<br>ATTTGTCAGTGGTCTGACAGATGG                         | Clone SEMA6A into<br>pcDNA3.1-3xFlag-C                 |
| LentiHygro_01F | GGAACCAATTCAGTCGACTGGATCCGCTTGG<br>TACCGAGCTCGGATCC                                 | Transfer gene from pcDNA3.1<br>to LentiHygro           |
| LentiHygro_01F | TTTGTACAAGAAAGCTGGGTCTAGACTCTAG<br>ACTCGAGCGGCCCG                                   | Transfer gene from pcDNA3.1<br>to LentiHygro           |
| TcsL_01F       | TTTAAGAAGGAGATATAACCATGGGATTCACA<br>ACTATAGATGGTAATAAATATTACTTTGACC<br>CAAC         | Clone TcsL-1856-2364 into<br>pET28a                    |
| TcsL_02R       | GCGGCCGCAAGCTTGTGCGACTTCACTAACTA<br>CTAATTCAGCTGTATCAGGGTCAAATAG                    | Clone TcsL-1856-2364 into<br>pET28a                    |
| TcsL_05F       | AAGAAGGAGATATAACCATGGGAATAATGT<br>AAGAATAAATCTAGATGGCAATACTAGAAG                    | Clone TcsL-1285-1804 into<br>pET28a                    |
| TcsL_06R       | GCGGCCGCAAGCTTGTGCGACAGCTGCAAGTG<br>AAAATGTTGAAATAATTTT                             | Clone TcsL-1285-1804 into<br>pET28a                    |
| TcsL_12F       | AACATTTTCACTTGCAGCTGTGACACCGAG<br>CTCGGATCCATG                                      | Clone 3xFLAG tag between<br>TcsL-1285-1804 and His tag |
| TcsL_13R       | CGAGTGC GGCCGCAAGCTTGTGCGACGAATTC<br>AGAACCAGAACCAGAACC                             | Clone 3xFLAG tag between<br>TcsL-1285-1804 and His tag |
| TcsL_14F       | ATAAAATACTTCTTTCTGGTGAATTA AAAAT<br>ATTGATGT TAAATTC AAATCATATTCAACAG<br>AAAATAGATT | Switch TcdB 1431-1600 to<br>TcdL                       |
| TcsL_15R       | TCTAGTATAAACTCGATATTAGATTGTAAGA<br>AATTAACGAAAATACTTTTTATATT CATACTT<br>TCT         | Switch TcdB 1431-1600 to<br>TcdL                       |
| TcsL_16F       | TCGTTAATTTCTTACAATCTAATATCGAGTTT<br>ATACTAGATACTAATTT CATAATAAGTGGTA<br>GC          | Switch TcdB 1431-1600 to<br>TcdL                       |
| TcsL_17R       | AACATCAATATTTTTAATTCACCAGAAAGAA<br>GTATTTTATAAGATTTTGATACTAAATCAATT<br>TCT          | Switch TcdB 1431-1600 to<br>TcdL                       |
| TcsL_18F       | ATAAATTACTTATTTCTGGCAATTGTATGAA<br>ATTGATAGAAA ACTCATCTGATATTCAAC                   | Switch TcsL 1431-1601 to<br>TcdB                       |
| TcsL_19R       | TCTAATATAAACTTAATATTAGGGTCTAGAT<br>TATTGTAGAAAATTTTTTTATATTGATACTT<br>TCTAAG        | Switch TcsL 1431-1601 to<br>TcdB                       |
| TcsL_20F       | TCTACAATAATCTAGACCCTAATATTAAGTT<br>TATATTAGATGCTAATTTTATAATAAGTGGT<br>ACTACTTCTATT  | Switch TcsL 1431-1601 to<br>TcdB                       |
| TcsL_21R       | TCTATCAATTT CATAACAATTGCCAGAAATAA<br>GTAATTTATATGATTTAGATAATAAATCAAC<br>TTCTATAA    | Switch TcsL 1431-1601 to<br>TcdB                       |
| lentiGP_01F    | AATGGACTATCATATGCTTACCGTAACTTGA<br>AAGTATTTTCG                                      | PCR the sgRNA locus                                    |

|                     |                                          |                     |
|---------------------|------------------------------------------|---------------------|
| lentiGP_03R         | ATGAATACTGCCATTTGTCTCAAGATCTAGT<br>TACGC | PCR the sgRNA locus |
| SEMA6A_Sense        | GCAGUGGAGUAUAACACCA[dT][dT]              | siRNA for SEMA6A    |
| SEMA6A_Antisense    | UGGUGUUAUACUCCACUGC[dT][dT]              | siRNA for SEMA6A    |
| SEMA6B_I_Sense      | CCGUGAAACAUGACUCCAA[dT][dT]              | siRNA for SEMA6B    |
| SEMA6B_I_Antisense  | UUGGAGUCAUGUUUCACGG[dT][dT]              | siRNA for SEMA6B    |
| SEMA6B_II_Sense     | GGGAUGCUCUUCACAGCUA[dT][dT]              | siRNA for SEMA6B    |
| SEMA6B_II_Antisense | UAGCUGUGAAGAGCAUCCC[dT][dT]              | siRNA for SEMA6B    |
| SEMA6B_III_Sense    | GAGUUUAACUACCUGGAGA[dT][dT]              | siRNA for SEMA6B    |
| SEMA6A_Antisense    | UGGUGUUAUACUCCACUGC[dT][dT]              | siRNA for SEMA6B    |
